# Supplementary material
Source: HighWire-hosted journal article supplement (https://erj.ersjournals.com/content/55/5/1902272)
Supplement: inline-supplementary-material-1 [file inline-supplementary-material-1.pdf]

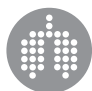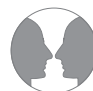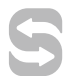

SHAREABLE PDF

# Correspondence regarding “T-box protein 4 mutation causing pulmonary arterial hypertension and lung disease”: a single-centre case series

Samara M.A. Jansen<sup>1</sup>, Lieke van den Heuvel<sup>2</sup>, Lilian J. Meijboom<sup>3</sup>, Suzanne I. M. Alsters<sup>2</sup>, Anton Vonk Noordegraaf<sup>1</sup>, Arjan C. Houweling<sup>2</sup> and Harm Jan Bogaard<sup>1</sup>

**Affiliations:** <sup>1</sup>Dept of Pulmonary Diseases, Amsterdam UMC, Vrije Universiteit Amsterdam, Amsterdam, The Netherlands. <sup>2</sup>Dept of Genetics, Amsterdam UMC, Vrije Universiteit Amsterdam, Amsterdam, The Netherlands. <sup>3</sup>Dept Of Radiology and Nuclear Medicine, Amsterdam UMC, Vrije Universiteit Amsterdam, Amsterdam, The Netherlands.

**Correspondence:** Harm Jan Bogaard, Amsterdam UMC, Vrije Universiteit Amsterdam, Dept of Pulmonology, Amsterdam Cardiovascular Sciences, De Boelelaan 1117, Amsterdam, The Netherlands.  
E-mail: [hj.bogaard@amsterdamumc.nl](mailto:hj.bogaard@amsterdamumc.nl)

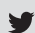

@ERSpublications

**A single-centre case series of adult subjects with a TBX4 mutation, in whom two distinctive findings on HRCT (*i.e.* tracheal and bronchial diverticulosis; irregular bronchial walls) were observed** <http://bit.ly/2v3s7HE>

**Cite this article as:** Jansen SMA, van den Heuvel L, Meijboom LJ, *et al.* Correspondence regarding “T-box protein 4 mutation causing pulmonary arterial hypertension and lung disease”: a single-centre case series. *Eur Respir J* 2020; 55: 1902272 [<https://doi.org/10.1183/13993003.02272-2019>].

This single-page version can be shared freely online.

*To the Editor:*

With great interest we read the article “T-box protein 4 mutation causing pulmonary arterial hypertension and lung disease” by MAURAC *et al.* [1]. The authors elegantly demonstrated a case of a female *TBX4* mutation carrier presenting with adult-onset pulmonary arterial hypertension (PAH) in combination with bronchial and pulmonary parenchymal abnormalities which could be related to this mutation [1].
